# Supplementary material for: Metasurface-Based Intelligent Identification of Total Angular Momentum Spectra for Beams
Source: Atypon-hosted journal article supplement (doi:10.1021/acsphotonics.4c01930), 2024-12-30
Supplement: ph4c01930_si_001.pdf [file ph4c01930_si_001.pdf]

404


# 404

---

  

### Page Not Found

###### We couldn't find what you were looking for.

3s Back To Home.
